# Supplementary material for: Near-infrared fluorescence probes for the selective and sensitive detection of sulfur ions based on glutathione capped gold nanoclusters
Source: Royal Society of Chemistry journal article supplement (doi:10.1039/d4nj04452e), 2024-01-01
Supplement: d4nj04452e1.pdf [file d4nj04452e1.pdf]

## Supplementary Material

### Near-infrared fluorescence probe for the selective and sensitive detection of sulfur ions based on glutathione capped gold nanocluster

Jia Shi<sup>a</sup>, Zhuorong Fan<sup>b</sup>, Rongrong Zhang<sup>b</sup>, Ziyu Feng<sup>b</sup>, Xiaojuan Gong<sup>b</sup>, Shengmei Song<sup>b</sup>, Wenjuan Dong<sup>b\*</sup>

*a Fenyang College of Shanxi Medical University, Fenyang 032200, PR China*

*b Institute of Environmental Science, Shanxi University, Taiyuan 030006, PR China*

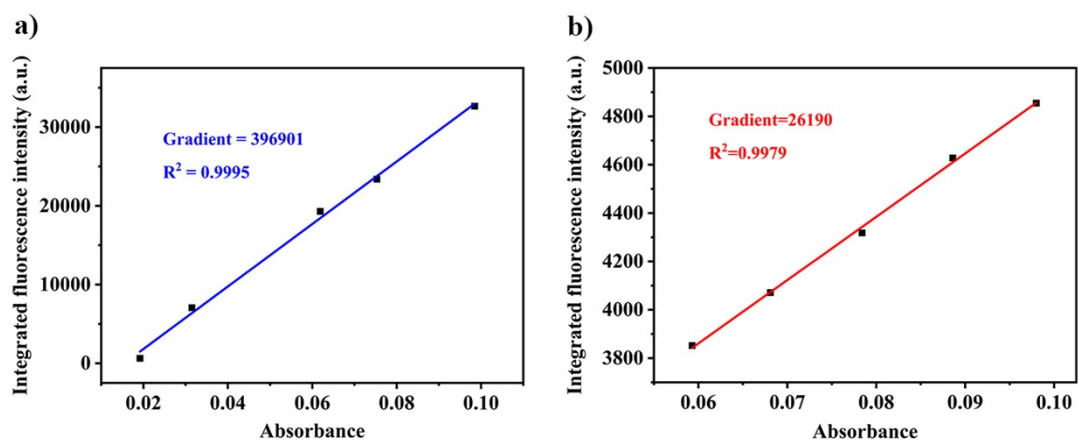

Fig. S1. The measurement of fluorescence quantum yield for GSH-AuNCs.

---

\* Corresponding author.

E-mail addresses: wjdong@sxu.edu.cn (W. Dong)

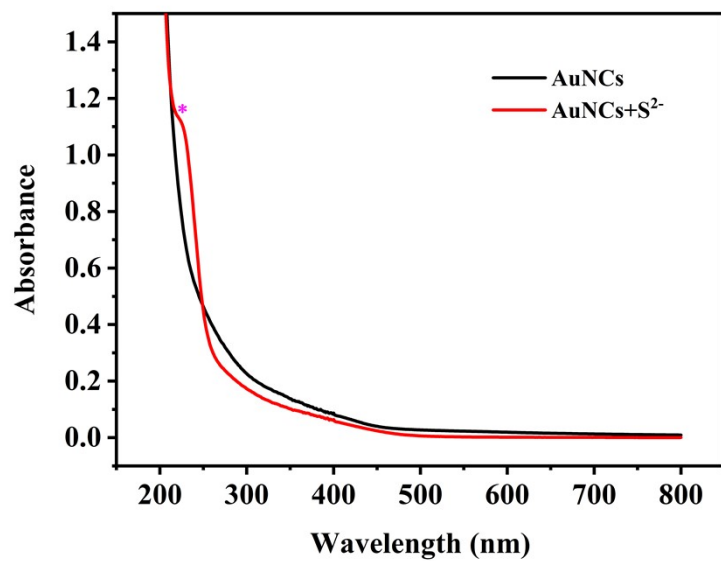

Fig. S2. UV-vis absorption spectra of GSH-AuNCs in the absence and presence of S<sup>2-</sup>.

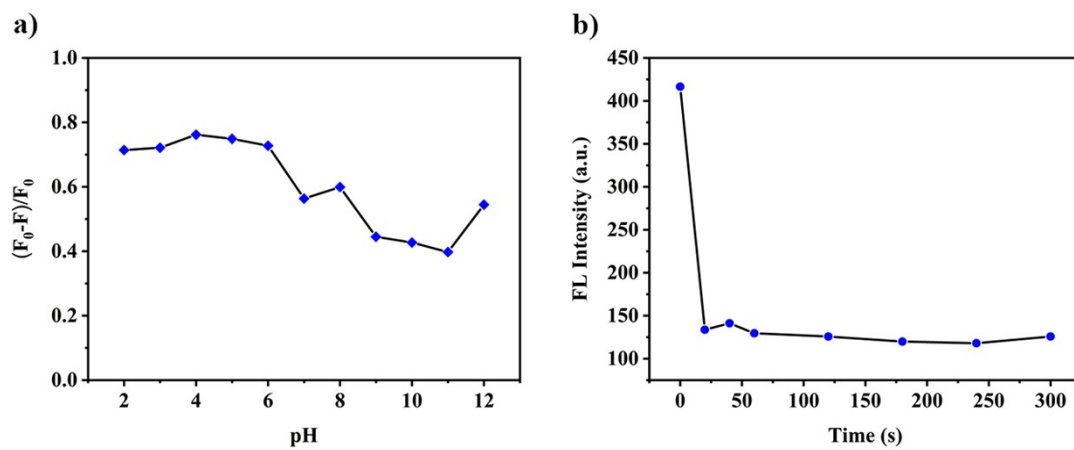

Fig. S3. The effect of pH (a) and incubation time (b) on the fluorescence intensity of GSH-AuNCs solution.
